# Supplementary material
Source: PubMed Central journal article supplement (PMC3993147)
Supplement: AEM.03477-13_zam999105224so1.pdf [file AEM.03477-13_zam999105224so1.pdf]

**Sustainable growth of *Dehalococcoides mccartyi* 195 by corrinoid salvaging and remodeling  
in defined lactate-fermenting consortia**

**Running title: Corrinoid salvaging in dechlorinating consortia**

Yujie Men<sup>a</sup>, Erica C. Seth<sup>b</sup>, Shan Yi<sup>a</sup>, Robert H. Allen<sup>c</sup>, Michiko E. Taga<sup>b</sup>, Lisa Alvarez-Cohen<sup>a,d#</sup>

Department of Civil and Environmental Engineering, University of California, Berkeley, California, USA<sup>a</sup>; Department of Plant and Microbial Biology, University of California, Berkeley, California, USA<sup>b</sup>; Division of Hematology, Department of Medicine, University of Colorado Anschutz Medical Campus, Aurora, Colorado, USA<sup>c</sup>; Earth Sciences Division, Lawrence Berkeley National Laboratory, Berkeley, California, USA<sup>d</sup>

#Address correspondence to Lisa Alvarez-Cohen, [alvarez@ce.berkeley.edu](mailto:alvarez@ce.berkeley.edu)

726 Davis Hall

Department of Civil and Environmental Engineering

University of California, Berkeley, CA 94720-1710

Phone: (510) 643-5969

Fax: (510) 643-5264

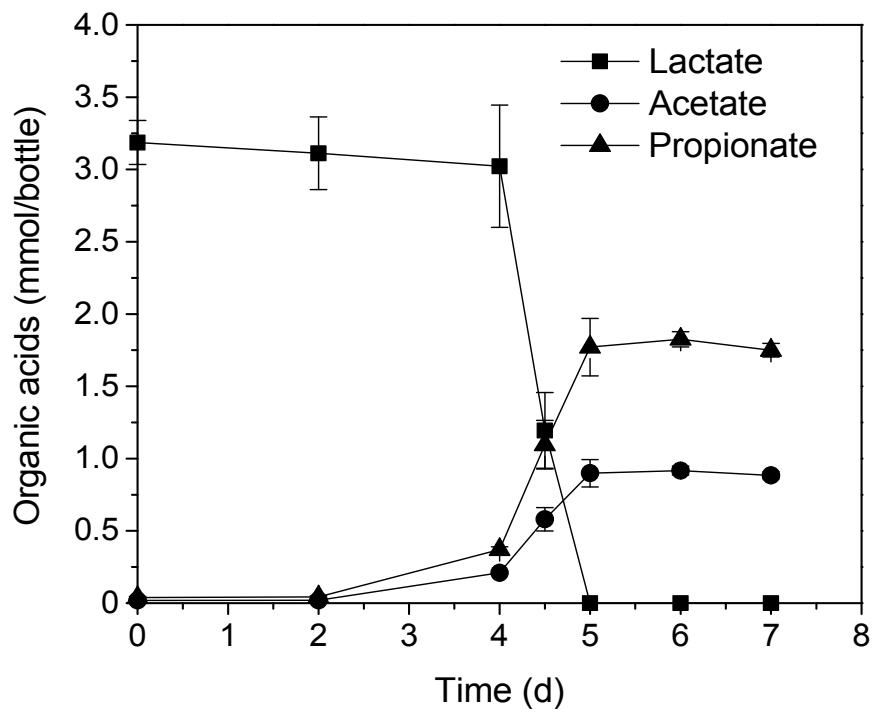

Fig. S1. Organic acids in Pfr7 grown on 28 mM lactate.

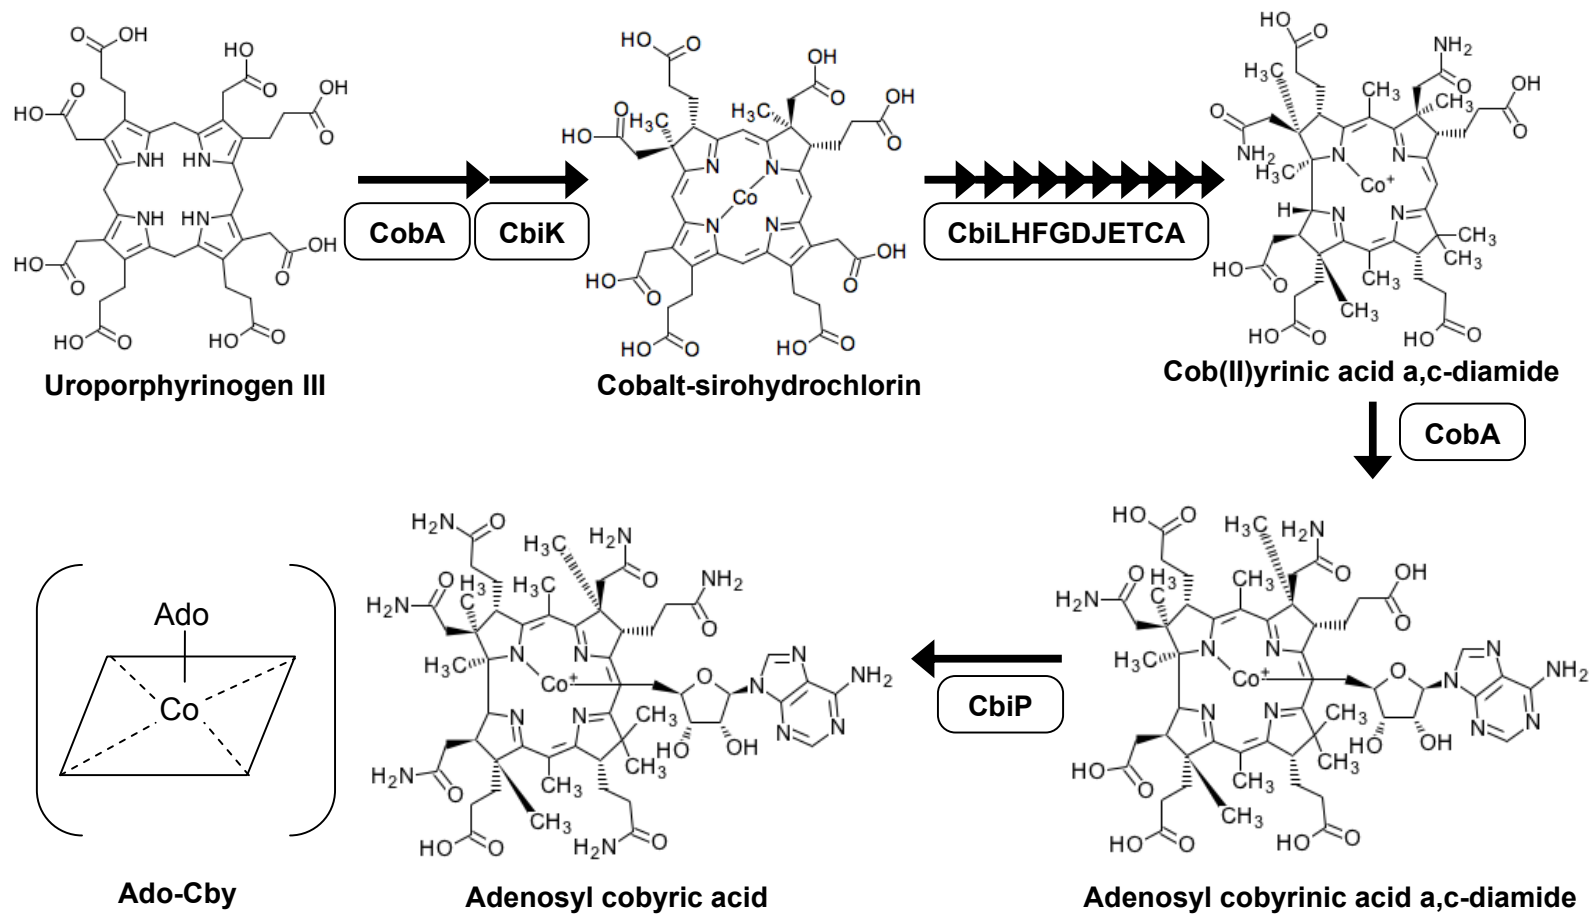

Fig. S2A. Up-stream corrinoid biosynthesis pathway

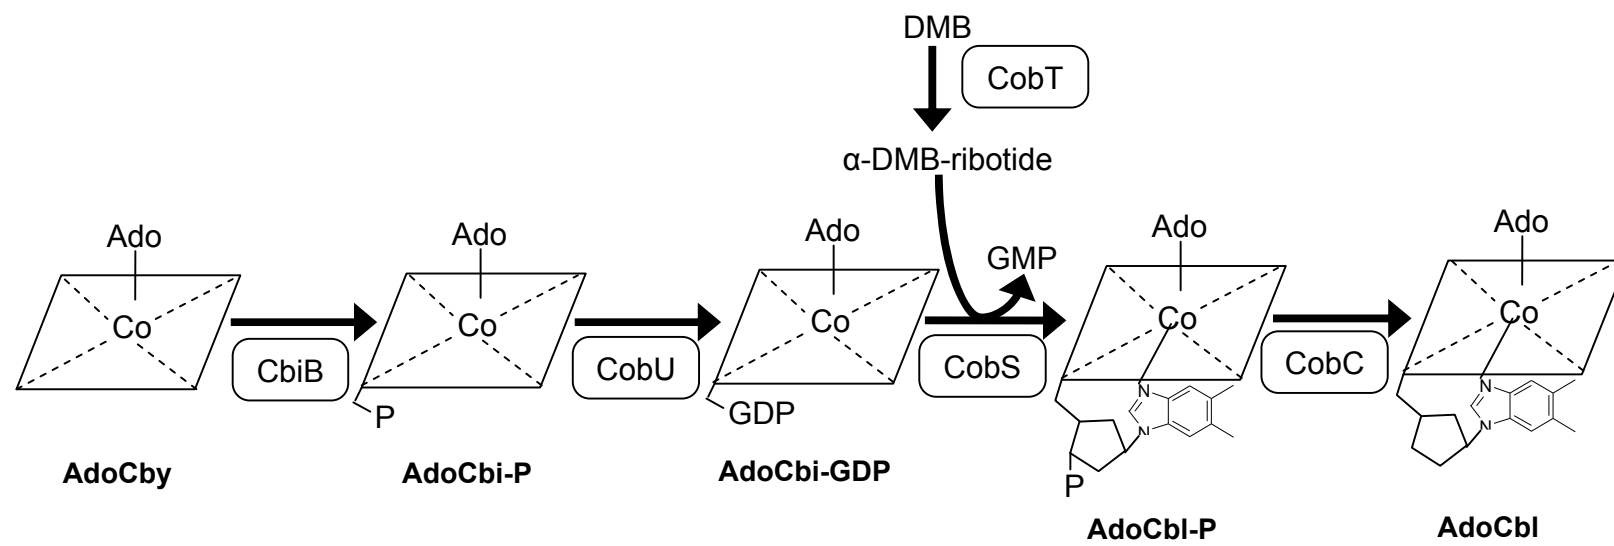

Fig. S2B. Lower ligand activation and attachment

Table S1 Primers used in qPCR targeting 16S rRNA genes

| Target gene<br>(NCBI accession No.) | Primer  | Sequence 5'-3'          | Annealing<br>T (°C) | Reference  |
|-------------------------------------|---------|-------------------------|---------------------|------------|
| Dhc195 (NC_002936)                  | Forward | GGTAATACGTAGGGAAGCAAGCG | 60                  | (1)        |
|                                     | Reverse | CCGGTTAAGCCGGGAAATT     |                     |            |
| DvH (NC_002937)                     | Forward | AATCGGAATCACTGGGCGTA    | 60                  | (1)        |
|                                     | Reverse | CCCTGACTTACCAAGCAGCC    |                     |            |
| Pfr7<br>(NZ_AKVN01000065.1)         | Forward | AGGCGACTTTCTGGACTGTG    | 60                  | This study |
|                                     | Reverse | CCCCAACACCTAGTACCCA     |                     |            |

Table S2 Dechlorination capability of different defined consortia after a two-week incubation

| Consortium | +LAC <sup>a</sup><br>+B <sub>12</sub> (74 nM) | +LAC           | +LAC<br>+DMB (36 nM) | +H <sub>2</sub>   | +H <sub>2</sub><br>+DMB (36 nM) |
|------------|-----------------------------------------------|----------------|----------------------|-------------------|---------------------------------|
| Dhc/DvH    | √ <sup>b</sup>                                | x <sup>c</sup> | x                    | N.D. <sup>d</sup> | N.D.                            |
| Dhc/PF     | x                                             | x              | x                    | x                 | √ <sup>e</sup>                  |
| Dhc/DvH/PF | √                                             | x              | √                    | N.D.              | N.D.                            |

<sup>a</sup>Lactate

<sup>b</sup>complete TCE dechlorination

<sup>c</sup>partial TCE dechlorination, accumulation of cDCE. The partial TCE dechlorination is probably due to the carryover of cobalamin provided in the seed culture.

<sup>d</sup>not done

<sup>e</sup>lactate was also amended in Dhc/PF as electron donor for PF

Table S3 Electron balance in different defined consortia

| Defined consortia                 | Lactate (mmol)           | Propionate (mmol) | Acetate (mmol) | Formate (mmol) | eeq <sup>b</sup> (mmol)      |                |                |                           |
|-----------------------------------|--------------------------|-------------------|----------------|----------------|------------------------------|----------------|----------------|---------------------------|
|                                   |                          |                   |                |                | Total available <sup>c</sup> | Dechlorination | H <sub>2</sub> | Biosynthesis <sup>d</sup> |
| Dhc195/DvH (+B <sub>12</sub> )    | 0.82 (0.18) <sup>a</sup> | -                 | 0.52           | 0.50           | 1.6                          | <b>0.40</b>    | 1.6            | 0.1-0.4                   |
| Dhc195/DvH/PF (+B <sub>12</sub> ) | 0.66 (0)                 | 0.28              | 0.30           | 0.05           | 0.86                         | <b>0.42</b>    | 0.6            | 0.1-0.8                   |
| Dhc195/DvH/PF (+DMB)              | 0.73 (0)                 | 0.29              | 0.34           | 0.10           | 1.3                          | <b>0.36</b>    | 0.7            | 0.1-0.7                   |

<sup>a</sup> The value outside of parentheses indicates total lactate added, the value in parentheses indicates lactate remained.

<sup>b</sup> Electron equivalent

<sup>c</sup> Values are calculated from lactate fermentation to acetate and hydrogen as shown in equation 1) and 2) below.

<sup>d</sup> Values are calculated using the cell numbers measured by qPCR described in the method section in each of the consortia and based on the stoichiometry of biosynthesis as shown in equation 7) below with the assumptions that Dhc195 is a sphere with a diameter of 0.5 μm (2), DvH and PF are rod shaped with a size of (0.5-1) × (3-5) (3) and (0.6-1) μm × (2-7) μm (4), respectively, a wet density of 1 g/mL and 0.2 g of dry weight per gram of wet weight (5).

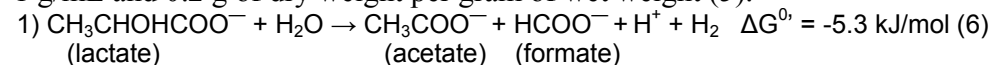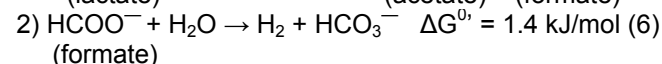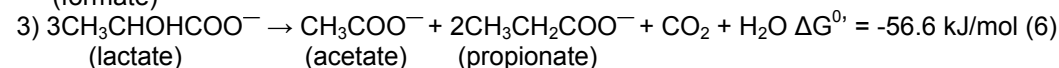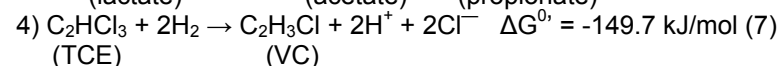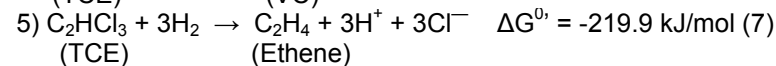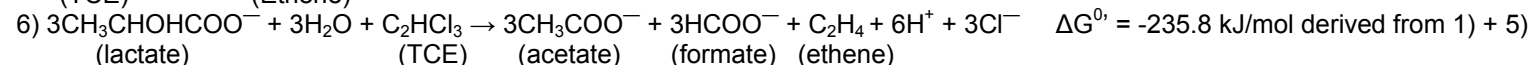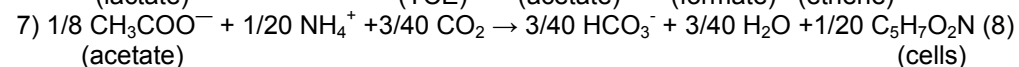

Table S5 Presence of genes involved in cobalamin biosynthesis pathway in the genome of Pfr7, DvH and Dhc195

|                                |                                                                          | Pfr7 <sup>a</sup>     | DvH <sup>b</sup>    | Dhc195 <sup>c</sup>             |
|--------------------------------|--------------------------------------------------------------------------|-----------------------|---------------------|---------------------------------|
| Cobalamin biosynthesis enzymes |                                                                          | Locus tag             | Locus tag           | Locus tag                       |
| CobA                           | uroporphyrin-III C-methyltransferase                                     | FR7_3128              | DVU0734             | ×                               |
| CbiK                           | cobalt chelatase                                                         | FR7_0449              | DVU0650/<br>DVU1365 | ×                               |
| CbiL                           | precorrin-2 C20-methyltransferase                                        | FR7_0463              | DVU0646             | ×                               |
| CbiH                           | precorrin-3B C17-methyltransferase                                       | FR7_3506              | DVU3170             | ×                               |
| CbiF                           | precorrin-4 C11-methyltransferase                                        | FR7_3508              | DVU2748             | ×                               |
| CbiG                           | cobalamin biosynthesis protein                                           | FR7_3507              | DVU3169             | ×                               |
| CbiD                           | cobalt-precorrin-6A synthase                                             | FR7_3511              | DVU2750             | ×                               |
| CbiJ                           | precorrin-6x reductase                                                   | FR7_3505              | ×                   | ×                               |
| CbiE                           | precorrin-6y C5,15-methyltransferase                                     | FR7_3510              | ×                   | DET0240,<br>DET0296             |
| CbiT                           | precorrin-6y C5,15-methyltransferase                                     | FR7_3509              | ×                   | ×                               |
| CbiC                           | Precorrin-8x methylmutase                                                | FR7_3504              | DVU3087             | ×                               |
| CbiA                           | cobyric acid a,c-diamide synthase                                        | FR7_3503              | DVU0405,<br>DVU3086 | DET0128                         |
| CobA                           | cob(I)alamin adenosyltransferase                                         | FR7_3530              | DVU1403             | DET0245,<br>DET1139,<br>DET1224 |
| CbiP                           | cobyric acid synthase                                                    | FR7_3501              | DVU0816             | DET0936                         |
| CbiB/<br>CobD                  | cobalamin biosynthesis protein                                           | FR7_3500              | DVU2237             | DET0654/<br>DET0688,<br>DET1138 |
| CobU                           | adenosylcobinamide-phosphate guanylyltransferase                         | FR7_3502              | DVU1007             | DET0660/<br>DET0694             |
| CobT                           | nicotinate-nucleotide dimethylbenzimidazole-P phosphoribosyl transferase | FR7_2880              | DVU3279             | DET0657/<br>DET0691             |
| CobC                           | alpha-ribazole-5'-P phosphatase                                          | FR7_0550,<br>FR7_2039 | ×                   | DET0659/<br>DET0693             |
| CobS                           | cobalamin 5'-phosphate synthase                                          | FR7_3499              | DVU0914             | DET0658/<br>DET0692             |
| CbiZ                           | adenosylcobinamide amidohydrolase                                        | ×                     | ×                   | DET0653/<br>DET0687             |

<sup>a</sup>*Pelosinus fermentans* strain R7; <sup>b</sup>*Desulfovibrio vulgaris* Hildenborough; <sup>c</sup>*Dehalococcoides mccartyi* strain 195



## References

1. **Men Y, Feil H, VerBerkmoes NC, Shah MB, Johnson DR, Lee PKH, West KA, Zinder SH, Andersen GL, Alvarez-Cohen L.** 2012. Sustainable syntrophic growth of *Dehalococcoides ethenogenes* strain 195 with *Desulfovibrio vulgaris* Hildenborough and *Methanobacterium congolense*: global transcriptomic and proteomic analyses. *ISME J* **6**:410-421.
2. **Maymó-Gatell X, Chien YT, Gossett JM, Zinder SH.** 1997. Isolation of a bacterium that reductively dechlorinates tetrachloroethene to ethene. *Science* **276**:1568-1571.
3. **Postgate JR, Campbell LL.** 1966. Classification of *Desulfovibrio* species, the nonsporulating sulfate-reducing bacteria. *Bacteriol. Rev.* **30**:732-738.
4. **Moe WM, Stebbing RE, Rao JU, Bowman KS, Nobre MF, da Costa MS, Rainey FA.** 2012. *Pelosinus defluvii* sp. nov., isolated from chlorinated solvent contaminated groundwater, emended description of the genus *Pelosinus*, and transfer of *Sporotalea propionica* to *Pelosinus propionicus* comb. nov. *IJSEM* **62**:1369-1376.
5. **Cupples AM, Spormann AM, McCarty PL.** 2003. Growth of a *Dehalococcoides*-like microorganism on vinyl chloride and cis-dichloroethene as electron acceptors as determined by competitive PCR. *Appl. Environ. Microbiol.* **69**:953-959.
6. **Madigan MT, Martinko JM, Stahl DA, Clark DP.** 2012. *Brock Biology of Microorganisms*, 13th Edition ed. Pearson Education, Inc., San Francisco.
7. **Duhamel M, Edwards EA.** 2007. Growth and yields of dechlorinators, acetogens, and methanogens during reductive dechlorination of chlorinated ethenes and dihaloelimination of 1,2-dichloroethane. *Environ. Sci. Technol.* **41**:2303-2310.
8. **Rittmann BE, McCarty PL.** 2001. *Environmental biotechnology: principles and applications*. McGraw-Hill, Boston.
